# Supplementary material for: Evidence of climate effects on the height-diameter relationships of tree species
Source: Springer Nature journal article supplement (doi:10.1007/s13595-018-0784-9), 2018-12-19
Supplement: MOESM1 [file 13595_2018_784_MOESM1_ESM.pdf]

Evidence of climate effects on the height-diameter  
relationships of tree species  
Supplementary Material

Mathieu Fortin<sup>1</sup>, Rosalinde Van Couwenberghe<sup>2</sup>, Vincent Perez<sup>1</sup>, and  
Christian Piedallu<sup>1</sup>

<sup>1</sup>Université de Lorraine, AgroParisTech, Inra, Silva, 54000 Nancy, France

<sup>2</sup>Herbes Folles à Nancy, 182 rue Jeanne d'Arc, 54000 Nancy, France

November 19, 2018

Table SM1: Parameter estimates of the linear function that replaces parameter  $A_{ij}$  in Eq 1.

| Species                                  | Intercept               | Basal area of other trees | Social status           | Square of social status | Slope inclination       | Harvest occurrence     | Mean temperature        | Square of mean temperature | Mean precipitation      |
|------------------------------------------|-------------------------|---------------------------|-------------------------|-------------------------|-------------------------|------------------------|-------------------------|----------------------------|-------------------------|
| <i>Abies alba</i>                        | $-1.049 \times 10^1$    | $1.689 \times 10^{-2}$    | -1.414                  | $1.228 \times 10^{-1}$  | $2.733 \times 10^{-3}$  | $1.590 \times 10^{-1}$ | $8.181 \times 10^{-1}$  | $-2.760 \times 10^{-2}$    | $2.884 \times 10^{-4}$  |
| <i>Acer campestre</i>                    | $-1.461 \times 10^1$    | $1.202 \times 10^{-2}$    | $-5.777 \times 10^{-1}$ |                         | $-1.090 \times 10^{-2}$ |                        | 2.407                   | $-9.231 \times 10^{-2}$    |                         |
| <i>Acer monspessulanum</i>               | -5.733                  | $3.527 \times 10^{-2}$    |                         |                         | $-7.851 \times 10^{-3}$ |                        | 1.098                   | $-3.920 \times 10^{-2}$    |                         |
| <i>Acer opalus</i>                       | -2.709                  | $2.321 \times 10^{-2}$    | $-6.186 \times 10^{-1}$ |                         | $-7.753 \times 10^{-3}$ |                        | $1.634 \times 10^{-1}$  |                            | $2.206 \times 10^{-3}$  |
| <i>Acer pseudoplatanus</i>               | -6.092                  | $1.831 \times 10^{-2}$    | $-7.181 \times 10^{-1}$ |                         | $-6.821 \times 10^{-3}$ |                        | 1.025                   | $-4.016 \times 10^{-2}$    |                         |
| <i>Alnus glutinosa</i>                   | $-1.366 \times 10^1$    | $1.697 \times 10^{-2}$    | $-1.525 \times 10^{-1}$ | $-1.518 \times 10^{-1}$ | $-9.833 \times 10^{-3}$ | $2.848 \times 10^{-1}$ | 2.152                   | $-7.989 \times 10^{-2}$    |                         |
| <i>Arbutus unedo</i>                     | 1.187                   | $1.956 \times 10^{-2}$    |                         |                         |                         |                        |                         |                            |                         |
| <i>Betula pendula</i>                    | -5.497                  | $2.333 \times 10^{-2}$    | $-5.591 \times 10^{-2}$ | $-1.509 \times 10^{-1}$ | $-1.160 \times 10^{-2}$ | $1.814 \times 10^{-1}$ | 1.022                   | $-3.876 \times 10^{-2}$    |                         |
| <i>Carpinus betulus</i>                  | -7.846                  | $9.897 \times 10^{-3}$    | $-1.911 \times 10^{-1}$ | $-1.524 \times 10^{-1}$ | $-1.374 \times 10^{-2}$ | $5.230 \times 10^{-2}$ | 1.336                   | $-4.956 \times 10^{-2}$    |                         |
| <i>Castanea sativa</i>                   | -5.401                  | $4.177 \times 10^{-2}$    | $7.668 \times 10^{-1}$  |                         | $-1.333 \times 10^{-2}$ |                        | 1.048                   | $-4.404 \times 10^{-2}$    |                         |
| <i>Corylus avellana</i>                  |                         | $4.718 \times 10^{-3}$    |                         |                         | $-5.051 \times 10^{-3}$ |                        | $4.392 \times 10^{-1}$  | $-1.413 \times 10^{-2}$    |                         |
| <i>Crataegus monogyna</i>                | 1.284                   | $3.681 \times 10^{-3}$    |                         | $-1.828 \times 10^{-1}$ | $-4.028 \times 10^{-3}$ |                        |                         |                            |                         |
| <i>Fagus sylvatica</i>                   | -6.601                  | $1.751 \times 10^{-2}$    | -1.142                  | $7.283 \times 10^{-2}$  | $-8.660 \times 10^{-3}$ | $2.789 \times 10^{-1}$ | $6.730 \times 10^{-1}$  | $-1.993 \times 10^{-2}$    | $8.884 \times 10^{-4}$  |
| <i>Fraxinus excelsior</i>                | -7.387                  | $7.115 \times 10^{-3}$    | $-7.484 \times 10^{-1}$ |                         | $-7.751 \times 10^{-3}$ | $2.168 \times 10^{-1}$ | 1.255                   | $-4.926 \times 10^{-2}$    |                         |
| <i>Ilex aquifolium</i>                   | $6.531 \times 10^{-1}$  |                           |                         |                         |                         |                        |                         |                            |                         |
| <i>Larix decidua</i>                     | -4.055                  | $2.704 \times 10^{-2}$    | $-7.422 \times 10^{-1}$ |                         |                         | $4.726 \times 10^{-1}$ | $1.966 \times 10^{-1}$  |                            |                         |
| <i>Picea abies</i>                       | -9.862                  | $2.078 \times 10^{-2}$    | -1.356                  | $1.116 \times 10^{-1}$  | $3.092 \times 10^{-3}$  | $2.347 \times 10^{-1}$ | $8.478 \times 10^{-1}$  | $-2.995 \times 10^{-2}$    |                         |
| <i>Picea sitchensis</i>                  | -2.589                  | $2.988 \times 10^{-2}$    | $-7.306 \times 10^{-1}$ |                         |                         | $4.120 \times 10^{-1}$ |                         |                            |                         |
| <i>Pinus halepensis</i>                  | $-2.588 \times 10^1$    | $1.161 \times 10^{-1}$    |                         |                         |                         |                        | 3.007                   | $-8.922 \times 10^{-2}$    |                         |
| <i>Pinus nigra</i>                       | -8.411                  | $3.202 \times 10^{-2}$    | -1.724                  | $2.432 \times 10^{-1}$  | $-3.493 \times 10^{-3}$ | $2.129 \times 10^{-1}$ | 1.011                   | $-3.830 \times 10^{-2}$    |                         |
| <i>Pinus nigra</i> var. <i>corsicana</i> | -2.737                  | $2.976 \times 10^{-2}$    | $-5.407 \times 10^{-1}$ |                         | $-4.012 \times 10^{-3}$ | $2.819 \times 10^{-1}$ | $1.145 \times 10^{-1}$  |                            |                         |
| <i>Pinus pinaster</i>                    | $-2.318 \times 10^1$    | $6.751 \times 10^{-2}$    | -1.576                  | $2.166 \times 10^{-1}$  | $-1.136 \times 10^{-2}$ | $1.439 \times 10^{-1}$ | 2.766                   | $-9.409 \times 10^{-2}$    | $1.772 \times 10^{-3}$  |
| <i>Pinus sylvestris</i>                  | -8.126                  | $3.787 \times 10^{-2}$    | $-6.761 \times 10^{-1}$ |                         | $-1.498 \times 10^{-2}$ | $5.604 \times 10^{-1}$ | 1.046                   | $-3.735 \times 10^{-2}$    |                         |
| <i>Pinus uncinata</i>                    | -2.762                  | $2.229 \times 10^{-2}$    |                         | $-1.347 \times 10^{-1}$ |                         | $3.423 \times 10^{-1}$ | $1.723 \times 10^{-1}$  |                            |                         |
| <i>Populus tremula</i>                   | -7.810                  | $2.078 \times 10^{-2}$    | $-6.085 \times 10^{-1}$ |                         | $-1.486 \times 10^{-2}$ | $1.168 \times 10^{-1}$ | 1.432                   | $-5.585 \times 10^{-2}$    |                         |
| <i>Populus spp.</i>                      | $7.285 \times 10^{-1}$  | $2.665 \times 10^{-2}$    | $-3.059 \times 10^{-1}$ |                         |                         |                        |                         |                            |                         |
| <i>Prunus avium</i>                      | -7.510                  | $1.601 \times 10^{-2}$    | $-7.251 \times 10^{-1}$ |                         | $-8.626 \times 10^{-3}$ | $2.890 \times 10^{-1}$ | 1.213                   | $-4.865 \times 10^{-2}$    |                         |
| <i>Pseudotsuga menziesii</i>             | $-1.375 \times 10^1$    | $2.295 \times 10^{-2}$    | -2.524                  | $3.718 \times 10^{-1}$  |                         | $1.693 \times 10^{-1}$ | 1.635                   | $-6.229 \times 10^{-2}$    |                         |
| <i>Quercus ilex</i>                      |                         | $2.341 \times 10^{-2}$    | $-2.983 \times 10^{-1}$ |                         |                         |                        |                         |                            | $-6.693 \times 10^{-4}$ |
| <i>Quercus patraea</i>                   | $-1.197 \times 10^1$    | $3.877 \times 10^{-2}$    | -1.438                  | $1.434 \times 10^{-1}$  | $-1.418 \times 10^{-2}$ | $2.265 \times 10^{-1}$ | 1.728                   | $-6.360 \times 10^{-2}$    |                         |
| <i>Quercus pubescens</i>                 | $-1.350 \times 10^1$    | $3.642 \times 10^{-2}$    | $-5.796 \times 10^{-1}$ |                         | $-1.216 \times 10^{-2}$ | $2.666 \times 10^{-1}$ | 1.834                   | $-6.413 \times 10^{-2}$    |                         |
| <i>Quercus pyrenaica</i>                 | $-6.137 \times 10^1$    | $2.578 \times 10^{-2}$    |                         | $-7.384 \times 10^{-2}$ |                         |                        | 8.511                   | $-2.974 \times 10^{-1}$    |                         |
| <i>Quercus robur</i>                     | $-1.031 \times 10^1$    | $4.819 \times 10^{-2}$    | $-4.694 \times 10^{-1}$ |                         | $-8.912 \times 10^{-3}$ | $1.802 \times 10^{-1}$ | 1.561                   | $-5.836 \times 10^{-2}$    |                         |
| <i>Quercus rubra</i>                     | 1.299                   | $3.018 \times 10^{-2}$    | $-3.152 \times 10^{-1}$ |                         |                         |                        |                         |                            |                         |
| <i>Quercus suber</i>                     | $9.889 \times 10^{-1}$  | $1.240 \times 10^{-2}$    |                         |                         | $-6.354 \times 10^{-3}$ | $2.107 \times 10^{-1}$ | $-7.619 \times 10^{-2}$ |                            | $1.173 \times 10^{-3}$  |
| <i>Robinia pseudoacacia</i>              | $-1.192 \times 10^1$    | $-2.432 \times 10^{-2}$   | $-8.936 \times 10^{-1}$ |                         | $-7.669 \times 10^{-3}$ |                        | 1.863                   | $-6.754 \times 10^{-2}$    |                         |
| <i>Salix caprea</i>                      | -4.524                  | $1.651 \times 10^{-2}$    |                         |                         |                         | $2.480 \times 10^{-1}$ | 1.301                   | $-5.372 \times 10^{-2}$    |                         |
| <i>Salix cinerea</i>                     | 2.371                   | $1.671 \times 10^{-2}$    |                         |                         |                         |                        |                         |                            |                         |
| <i>Sorbus aria</i>                       | -3.387                  | $1.978 \times 10^{-2}$    | $-7.277 \times 10^{-1}$ |                         | $-1.352 \times 10^{-2}$ | $1.658 \times 10^{-1}$ | $7.953 \times 10^{-1}$  | $-3.209 \times 10^{-2}$    |                         |
| <i>Sorbus aucuparia</i>                  | $9.747 \times 10^{-1}$  | $2.662 \times 10^{-2}$    |                         |                         | $-6.023 \times 10^{-3}$ | $3.130 \times 10^{-1}$ | $1.011 \times 10^{-1}$  |                            |                         |
| <i>Sorbus torminalis</i>                 | $5.794 \times 10^{-1}$  | $1.509 \times 10^{-2}$    |                         |                         | $-9.981 \times 10^{-3}$ | $1.923 \times 10^{-1}$ |                         |                            | $1.745 \times 10^{-3}$  |
| <i>Tilia cordata</i>                     | $-5.195 \times 10^{-1}$ | $2.293 \times 10^{-2}$    | $-1.483 \times 10^{-1}$ | $-1.069 \times 10^{-1}$ | $-9.562 \times 10^{-3}$ |                        |                         |                            |                         |
| <i>Tilia platyphyllos</i>                | $-7.061 \times 10^{-1}$ | $1.952 \times 10^{-2}$    | $-7.162 \times 10^{-1}$ |                         | $-5.557 \times 10^{-3}$ |                        |                         |                            |                         |
| <i>Ulmus minor</i>                       | 1.894                   | $1.234 \times 10^{-2}$    |                         | $-1.393 \times 10^{-1}$ | $-7.791 \times 10^{-3}$ |                        | $-1.322 \times 10^{-1}$ |                            |                         |

Table SM2: Parameter estimates of the linear function that replaces parameter  $B_{ij}$  in Eq 1.

| Species                                  | Intercept              | Basal area of other trees | Social status           |
|------------------------------------------|------------------------|---------------------------|-------------------------|
| <i>Abies alba</i>                        | 3.164                  |                           |                         |
| <i>Acer campestre</i>                    | 1.302                  |                           |                         |
| <i>Acer monspessulanum</i>               | $1.568 \times 10^{-1}$ |                           |                         |
| <i>Acer opalus</i>                       | 1.133                  |                           |                         |
| <i>Acer pseudoplatanus</i>               | 1.695                  |                           |                         |
| <i>Alnus glutinosa</i>                   | 1.410                  |                           |                         |
| <i>Arbutus unedo</i>                     | $1.603 \times 10^{-1}$ |                           |                         |
| <i>Betula pendula</i>                    | 1.236                  |                           |                         |
| <i>Carpinus betulus</i>                  | 1.381                  |                           |                         |
| <i>Castanea sativa</i>                   | 1.208                  | $-7.202 \times 10^{-3}$   | $-2.991 \times 10^{-1}$ |
| <i>Corylus avellana</i>                  |                        |                           |                         |
| <i>Crataegus monogyna</i>                | $5.545 \times 10^{-1}$ |                           |                         |
| <i>Fagus sylvatica</i>                   | 2.155                  |                           |                         |
| <i>Fraxinus excelsior</i>                | 1.743                  | $3.825 \times 10^{-3}$    |                         |
| <i>Ilex aquifolium</i>                   | $7.355 \times 10^{-1}$ |                           |                         |
| <i>Larix decidua</i>                     | 2.140                  |                           |                         |
| <i>Picea abies</i>                       | 3.081                  |                           |                         |
| <i>Picea sitchensis</i>                  | 2.220                  |                           |                         |
| <i>Pinus halepensis</i>                  | $9.872 \times 10^{-1}$ | $-2.438 \times 10^{-2}$   |                         |
| <i>Pinus nigra</i>                       | 2.071                  |                           |                         |
| <i>Pinus nigra</i> var. <i>corsicana</i> | 1.652                  |                           |                         |
| <i>Pinus pinaster</i>                    | 2.274                  | $-1.154 \times 10^{-2}$   |                         |
| <i>Pinus sylvestris</i>                  | 1.600                  |                           |                         |
| <i>Pinus uncinata</i>                    | 1.210                  |                           |                         |
| <i>Populus tremula</i>                   | 1.516                  |                           |                         |
| <i>Populus</i> spp.                      | 1.577                  |                           |                         |
| <i>Prunus avium</i>                      | 1.723                  |                           |                         |
| <i>Pseudotsuga menziesii</i>             | 3.161                  |                           |                         |
| <i>Quercus ilex</i>                      | $8.418 \times 10^{-1}$ |                           |                         |
| <i>Quercus patraea</i>                   | 1.955                  | $-2.373 \times 10^{-3}$   |                         |
| <i>Quercus pubescens</i>                 | 1.365                  |                           |                         |
| <i>Quercus pyrenaica</i>                 | 1.347                  |                           |                         |
| <i>Quercus robur</i>                     | 1.496                  | $-7.527 \times 10^{-3}$   |                         |
| <i>Quercus rubra</i>                     | 1.140                  |                           |                         |
| <i>Quercus suber</i>                     | $5.401 \times 10^{-1}$ |                           |                         |
| <i>Robinia pseudoacacia</i>              | 1.692                  | $1.132 \times 10^{-2}$    |                         |
| <i>Salix caprea</i>                      |                        |                           |                         |
| <i>Salix cinerea</i>                     | $1.275 \times 10^{-1}$ |                           |                         |
| <i>Sorbus aria</i>                       | $9.746 \times 10^{-1}$ |                           |                         |
| <i>Sorbus aucuparia</i>                  | $3.716 \times 10^{-1}$ |                           |                         |
| <i>Sorbus torminalis</i>                 | $8.231 \times 10^{-1}$ |                           |                         |
| <i>Tilia cordata</i>                     | 1.733                  |                           |                         |
| <i>Tilia platyphyllos</i>                | 1.917                  |                           |                         |
| <i>Ulmus minor</i>                       | 1.404                  |                           |                         |

Table SM3: Estimated biases (m) from the cross-validation. Relative values appear in parentheses. Estimated biases in bold are those greater than  $\pm 4\%$ . n/a: non-applicable.

| Species                                  | 2005                 | 2006                 | 2007                 | 2008                 | 2009                 | 2010               | 2011                 | 2012                 | 2013                 | 2014                 | 2015                 |
|------------------------------------------|----------------------|----------------------|----------------------|----------------------|----------------------|--------------------|----------------------|----------------------|----------------------|----------------------|----------------------|
| <i>Abies alba</i>                        | 0.47 (2.4%)          | 0.29 (1.5%)          | 0.36 (1.8%)          | 0.02 (0.1%)          | 0.04 (0.2%)          | -0.06 (-0.3%)      | 0.02 (0.1%)          | 0.34 (1.6%)          | 0.51 (2.5%)          | -0.15 (-0.7%)        | -0.09 (-0.4%)        |
| <i>Acer campestre</i>                    | 0.20 (1.5%)          | -0.04 (-0.3%)        | -0.15 (-1.2%)        | -0.12 (-1.0%)        | -0.36 (-2.8%)        | 0.05 (0.4%)        | 0.21 (1.6%)          | 0.07 (0.5%)          | -0.05 (-0.4%)        | -0.04 (-0.3%)        | -0.03 (-0.2%)        |
| <i>Acer monspessulanum</i>               | 0.03 (0.4%)          | <b>0.46</b> (5.2%)   | 0.31 (3.7%)          | -0.32 (-3.9%)        | <b>0.36</b> (4.2%)   | 0.22 (2.4%)        | 0.03 (0.3%)          | 0.13 (1.5%)          | 0.14 (1.7%)          | <b>-0.54</b> (-6.7%) | <b>-0.39</b> (-4.4%) |
| <i>Acer opalus</i>                       | 0.02 (0.2%)          | 0.23 (1.9%)          | -0.12 (-1.1%)        | 0.37 (3.5%)          | -0.27 (-2.5%)        | <b>0.51</b> (4.6%) | -0.16 (-1.5%)        | <b>-0.82</b> (-7.6%) | 0.09 (0.8%)          | 0.30 (2.4%)          | -0.06 (-0.5%)        |
| <i>Acer pseudoplatanus</i>               | 0.22 (1.3%)          | 0.44 (2.7%)          | 0.44 (2.6%)          | 0.23 (1.4%)          | 0.18 (1.1%)          | 0.08 (0.5%)        | 0.35 (2.1%)          | -0.19 (-1.2%)        | 0.41 (2.4%)          | -0.04 (-0.2%)        | 0.18 (1.0%)          |
| <i>Alnus glutinosa</i>                   | 0.39 (2.3%)          | 0.21 (1.2%)          | 0.30 (1.7%)          | -0.05 (-0.3%)        | -0.35 (-2.0%)        | 0.21 (1.2%)        | -0.05 (-0.3%)        | 0.45 (2.5%)          | -0.52 (-3.2%)        | -0.61 (-3.4%)        | <b>-0.93</b> (-5.3%) |
| <i>Arbutus unedo</i>                     | 0.11 (1.8%)          | -0.06 (-1.0%)        | 0.19 (3.0%)          | 0.05 (0.8%)          | 0.17 (2.7%)          | 0.10 (1.6%)        | 0.04 (0.7%)          | <b>-0.27</b> (-4.2%) | -0.09 (-1.5%)        | -0.18 (-3.2%)        | <b>-0.33</b> (-6.1%) |
| <i>Betula pendula</i>                    | 0.22 (1.4%)          | 0.38 (2.4%)          | 0.00 (0.0%)          | -0.03 (-0.2%)        | 0.01 (0.0%)          | -0.05 (-0.3%)      | -0.14 (-0.9%)        | 0.31 (2.0%)          | -0.02 (-0.2%)        | 0.24 (1.4%)          | 0.01 (0.1%)          |
| <i>Carpinus betulus</i>                  | 0.56 (3.8%)          | 0.30 (2.0%)          | 0.23 (1.6%)          | -0.02 (-0.2%)        | -0.13 (-0.8%)        | -0.03 (-0.2%)      | 0.22 (1.4%)          | 0.24 (1.5%)          | 0.20 (1.3%)          | -0.02 (-0.1%)        | 0.20 (1.3%)          |
| <i>Castanea sativa</i>                   | 0.44 (3.0%)          | -0.05 (-0.4%)        | -0.25 (-1.7%)        | -0.20 (-1.3%)        | -0.05 (-0.3%)        | -0.06 (-0.4%)      | 0.21 (1.3%)          | -0.01 (-0.1%)        | 0.31 (2.0%)          | 0.32 (2.0%)          | -0.04 (-0.2%)        |
| <i>Corylus avellana</i>                  | <b>0.55</b> (5.8%)   | <b>0.39</b> (4.2%)   | 0.15 (1.7%)          | <b>-0.39</b> (-4.5%) | -0.22 (-2.5%)        | 0.11 (1.3%)        | -0.10 (-1.2%)        | -0.04 (-0.5%)        | -0.02 (-0.2%)        | 0.07 (0.8%)          | 0.06 (0.6%)          |
| <i>Crataegus monogyna</i>                |                      |                      | <b>0.46</b> (5.9%)   | -0.14 (-1.9%)        | -0.09 (-1.3%)        | -0.06 (-0.8%)      | -0.04 (-0.6%)        | 0.06 (0.7%)          | 0.01 (0.2%)          | -0.25 (-3.4%)        | 0.25 (3.4%)          |
| <i>Fagus sylvatica</i>                   | 0.50 (2.6%)          | 0.31 (1.7%)          | 0.24 (1.3%)          | 0.07 (0.4%)          | 0.01 (0.1%)          | 0.26 (1.4%)        | 0.26 (1.4%)          | 0.39 (2.0%)          | 0.17 (0.9%)          | 0.12 (0.6%)          | 0.30 (1.4%)          |
| <i>Fragaria vesicaria</i>                | 0.78 (4.0%)          | 0.68 (3.7%)          | 0.41 (2.2%)          | 0.23 (1.3%)          | 0.00 (0.0%)          | 0.16 (0.9%)        | 0.34 (1.8%)          | 0.23 (1.3%)          | 0.13 (0.7%)          | -0.03 (-0.2%)        | -0.05 (-0.3%)        |
| <i>Ilex aquifolium</i>                   |                      |                      | <b>0.54</b> (6.8%)   | 0.11 (1.5%)          | -0.16 (-2.3%)        | 0.12 (1.6%)        | 0.15 (1.9%)          | 0.10 (1.3%)          | 0.17 (2.2%)          | -0.01 (-0.2%)        | -0.03 (-0.5%)        |
| <i>Larix decidua</i>                     | 0.24 (1.2%)          | 0.10 (0.5%)          | 0.61 (3.3%)          | -0.52 (-3.0%)        | 0.18 (0.9%)          | 0.02 (0.1%)        | 0.16 (0.9%)          | 0.07 (0.4%)          | -0.34 (-1.7%)        | -0.46 (-2.5%)        | 0.03 (0.1%)          |
| <i>Picea abies</i>                       | 0.16 (0.8%)          | 0.15 (0.8%)          | 0.38 (1.9%)          | 0.15 (0.7%)          | 0.31 (1.5%)          | 0.06 (0.3%)        | 0.24 (1.1%)          | 0.22 (1.1%)          | 0.75 (3.5%)          | 0.00 (0.0%)          | 0.45 (2.0%)          |
| <i>Picea sitchensis</i>                  | -0.11 (-0.6%)        | -0.04 (-0.2%)        | -0.52 (-2.6%)        | <b>1.43</b> (6.8%)   | -0.46 (-2.3%)        | -0.41 (-1.9%)      | -0.58 (-3.0%)        | 0.07 (0.3%)          | <b>1.17</b> (5.8%)   | -0.54 (-2.5%)        | -0.19 (-0.8%)        |
| <i>Pinus halepensis</i>                  | 0.22 (1.8%)          | 0.24 (1.9%)          | 0.54 (4.0%)          | 0.04 (0.3%)          | 0.08 (0.6%)          | -0.15 (-1.2%)      | -0.01 (-0.1%)        | -0.35 (-2.9%)        | -0.32 (-2.6%)        | -0.13 (-1.0%)        | -0.03 (-0.2%)        |
| <i>Pinus nigra</i>                       | <b>-0.65</b> (-4.6%) | -0.38 (-2.8%)        | <b>-0.68</b> (-4.9%) | -0.15 (-1.1%)        | 0.29 (2.1%)          | -0.17 (-1.2%)      | -0.10 (-0.6%)        | <b>0.69</b> (4.7%)   | 0.30 (2.1%)          | 0.38 (2.5%)          | 0.15 (1.0%)          |
| <i>Pinus nigra</i> var. <i>corsicana</i> | <b>-1.05</b> (-7.3%) | 0.13 (0.8%)          | -0.07 (-0.4%)        | -0.18 (-1.1%)        | -0.08 (-0.4%)        | -0.45 (-2.8%)      | -0.02 (-0.1%)        | 0.62 (3.7%)          | 0.11 (0.7%)          | <b>1.31</b> (7.0%)   | 0.42 (2.3%)          |
| <i>Pinus pinaster</i>                    | 0.08 (0.5%)          | -0.01 (0.0%)         | -0.02 (-0.1%)        | -0.27 (-1.6%)        | -0.14 (-0.8%)        | 0.20 (1.1%)        | 0.05 (0.3%)          | -0.21 (-1.2%)        | -0.09 (-0.6%)        | 0.09 (0.5%)          | 0.05 (0.3%)          |
| <i>Pinus sylvestris</i>                  | -0.30 (-2.0%)        | -0.51 (-3.6%)        | -0.49 (-3.5%)        | -0.22 (-1.5%)        | -0.32 (-2.2%)        | -0.06 (-0.4%)      | 0.03 (0.2%)          | -0.05 (-0.3%)        | -0.15 (-1.0%)        | 0.20 (1.2%)          | 0.05 (0.3%)          |
| <i>Pinus uncinata</i>                    | <b>1.19</b> (10.6%)  | 0.19 (1.8%)          | <b>-0.48</b> (-4.9%) | 0.03 (0.3%)          | -0.36 (-3.3%)        | <b>0.47</b> (4.4%) | <b>-0.47</b> (-4.8%) | -0.03 (-0.4%)        | <b>-0.78</b> (-7.6%) | 0.02 (0.2%)          | 0.07 (0.6%)          |
| <i>Populus spp.</i>                      | 0.35 (1.3%)          | 1.03 (4.8%)          | 0.30 (1.2%)          | 0.81 (3.2%)          | -0.08 (-0.3%)        | -0.46 (-1.9%)      | -0.14 (-0.6%)        | -0.21 (-0.8%)        | 0.45 (1.8%)          | <b>1.90</b> (6.8%)   | -0.91 (-3.6%)        |
| <i>Populus tremula</i>                   | 0.05 (0.3%)          | 0.39 (2.2%)          | 0.23 (1.3%)          | 0.40 (2.3%)          | -0.23 (-1.3%)        | -0.30 (-1.7%)      | -0.12 (-0.7%)        | 0.25 (1.4%)          | 0.16 (0.9%)          | 0.70 (3.5%)          | -0.22 (-1.2%)        |
| <i>Prunus avium</i>                      | 0.36 (2.3%)          | 0.37 (2.5%)          | 0.33 (2.2%)          | -0.30 (-2.1%)        | -0.53 (-3.7%)        | -0.55 (-3.9%)      | -0.07 (-0.5%)        | 0.13 (0.8%)          | -0.09 (-0.6%)        | 0.22 (1.4%)          | -0.08 (-0.5%)        |
| <i>Pseudotsuga menziesii</i>             | 0.48 (2.3%)          | -0.02 (-0.1%)        | -0.29 (-1.4%)        | -0.19 (-0.9%)        | -0.11 (-0.5%)        | -0.21 (-0.9%)      | 0.31 (1.4%)          | 0.36 (1.6%)          | 0.97 (4.0%)          | 0.53 (2.2%)          | 0.55 (2.2%)          |
| <i>Quercus ilex</i>                      | <b>0.62</b> (7.3%)   | 0.26 (3.1%)          | 0.22 (2.8%)          | -0.07 (-1.0%)        | 0.07 (1.0%)          | <b>0.34</b> (4.5%) | 0.04 (0.6%)          | -0.05 (-0.6%)        | -0.05 (-0.6%)        | -0.04 (-0.5%)        | -0.06 (-0.8%)        |
| <i>Quercus patraea</i>                   | 0.23 (1.2%)          | 0.21 (1.1%)          | 0.07 (0.4%)          | -0.16 (-0.8%)        | -0.15 (-0.7%)        | -0.01 (-0.1%)      | 0.20 (1.0%)          | 0.17 (0.8%)          | 0.17 (0.8%)          | 0.49 (2.2%)          | 0.30 (1.4%)          |
| <i>Quercus pubescens</i>                 | 0.13 (1.2%)          | -0.09 (-0.8%)        | -0.08 (-0.8%)        | 0.04 (0.4%)          | -0.27 (-2.3%)        | 0.31 (2.6%)        | <b>0.55</b> (4.3%)   | 0.12 (1.0%)          | 0.18 (1.5%)          | 0.10 (0.8%)          | 0.13 (1.1%)          |
| <i>Quercus pyrenaica</i>                 | <b>0.62</b> (4.5%)   | -0.13 (-1.0%)        | 0.06 (0.5%)          | -0.18 (-1.3%)        | -0.12 (-0.8%)        | 0.09 (0.6%)        | 0.06 (0.5%)          | 0.50 (3.3%)          | <b>-0.69</b> (-5.6%) | -0.08 (-0.6%)        | 0.43 (2.6%)          |
| <i>Quercus robur</i>                     | 0.30 (1.6%)          | 0.24 (1.3%)          | 0.08 (0.4%)          | -0.02 (-0.1%)        | -0.17 (-0.9%)        | -0.09 (-0.5%)      | -0.02 (-0.1%)        | 0.25 (1.3%)          | 0.03 (0.2%)          | 0.17 (0.9%)          | 0.42 (2.1%)          |
| <i>Quercus rubra</i>                     | <b>0.75</b> (4.1%)   | 0.24 (1.4%)          | 0.41 (2.2%)          | <b>0.76</b> (4.2%)   | <b>0.95</b> (5.4%)   | -0.63 (-3.6%)      | 0.05 (0.3%)          | <b>-1.38</b> (-9.5%) | 0.75 (4.0%)          | 0.35 (1.9%)          | <b>1.56</b> (7.4%)   |
| <i>Quercus suber</i>                     | 0.08 (0.9%)          | <b>-0.44</b> (-5.8%) | 0.13 (1.6%)          | -0.01 (-0.1%)        | 0.05 (0.6%)          | -0.06 (-0.7%)      | <b>0.45</b> (5.4%)   | <b>-0.43</b> (-5.9%) | -0.28 (-3.5%)        | <b>-0.60</b> (-8.2%) | 0.15 (1.7%)          |
| <i>Robinia pseudoacacia</i>              | <b>0.86</b> (5.2%)   | 0.32 (2.0%)          | 0.14 (0.9%)          | 0.55 (3.3%)          | -0.16 (-1.0%)        | -0.07 (-0.5%)      | 0.16 (1.0%)          | 0.01 (0.1%)          | 0.07 (0.5%)          | -0.38 (-2.2%)        | -0.49 (-2.9%)        |
| <i>Salix caprea</i>                      | <b>0.69</b> (5.9%)   | -0.03 (-0.3%)        | 0.14 (1.3%)          | -0.05 (-0.5%)        | -0.28 (-2.5%)        | -0.14 (-1.3%)      | <b>-0.70</b> (-6.8%) | -0.22 (-2.0%)        | -0.31 (-2.9%)        | -0.38 (-3.4%)        | -0.37 (-3.3%)        |
| <i>Salix cinerea</i>                     | <b>1.26</b> (11.4%)  | <b>0.67</b> (6.0%)   | -0.07 (-0.8%)        | <b>0.92</b> (8.3%)   | <b>-0.61</b> (-6.7%) | 0.01 (0.1%)        | -0.30 (-3.2%)        | -0.08 (-0.8%)        | <b>-0.56</b> (-6.2%) | 0.18 (1.7%)          | 0.01 (0.1%)          |
| <i>Sorbus aria</i>                       | 0.04 (0.4%)          | -0.11 (-1.1%)        | -0.02 (-0.2%)        | 0.00 (0.0%)          | 0.21 (2.0%)          | 0.21 (2.1%)        | 0.30 (2.9%)          | 0.05 (0.5%)          | 0.01 (0.1%)          | -0.16 (-1.6%)        | 0.04 (0.4%)          |
| <i>Sorbus aucuparia</i>                  | <b>0.73</b> (6.5%)   | 0.15 (1.4%)          | -0.13 (-1.3%)        | <b>-0.41</b> (-4.1%) | -0.29 (-2.9%)        | -0.31 (-3.1%)      | -0.31 (-3.2%)        | -0.13 (-1.3%)        | <b>-0.42</b> (-4.6%) | 0.03 (0.3%)          | 0.09 (0.9%)          |
| <i>Sorbus torminalis</i>                 | <b>0.52</b> (4.5%)   | 0.03 (0.3%)          | -0.17 (-1.6%)        | 0.20 (1.8%)          | 0.09 (0.8%)          | -0.32 (-3.0%)      | 0.27 (2.4%)          | 0.10 (0.9%)          | -0.30 (-2.8%)        | 0.00 (0.0%)          | 0.02 (0.2%)          |
| <i>Tilia cordata</i>                     | 0.60 (3.6%)          | 0.26 (1.7%)          | 0.31 (1.9%)          | -0.44 (-2.8%)        | 0.01 (0.1%)          | 0.55 (3.4%)        | -0.21 (-1.4%)        | 0.10 (0.9%)          | 0.24 (1.5%)          | 0.56 (3.3%)          | -0.18 (-1.0%)        |
| <i>Tilia platyphyllos</i>                | 0.03 (0.2%)          | 0.49 (3.2%)          | 0.02 (0.1%)          | -0.41 (-2.7%)        | 0.09 (0.6%)          | 0.13 (0.8%)        | 0.27 (1.7%)          | 0.13 (0.8%)          | -0.05 (-0.3%)        | -0.02 (-0.1%)        | 0.12 (0.7%)          |
| <i>Ulmus minor</i>                       | 0.37 (3.2%)          | 0.39 (3.4%)          | -0.11 (-1.0%)        | <b>-0.46</b> (-4.3%) | -0.38 (-3.6%)        | 0.14 (1.2%)        | 0.30 (2.6%)          | 0.27 (2.4%)          | 0.07 (0.6%)          | -0.08 (-0.7%)        | <b>-0.73</b> (-6.6%) |

Table SM4: Estimated root mean square errors (m) from the cross-validation. Relative root mean square errors appear in parentheses. n/a: non-applicable.

| Species                           | 2005      | 2006      | 2007      | 2008      | 2009      | 2010      | 2011      | 2012      | 2013      | 2014      | 2015      |
|-----------------------------------|-----------|-----------|-----------|-----------|-----------|-----------|-----------|-----------|-----------|-----------|-----------|
| <i>Abies alba</i>                 | 3.1 (16%) | 3.1 (16%) | 3.2 (17%) | 3.2 (17%) | 3.2 (16%) | 3.0 (16%) | 3.1 (16%) | 3.4 (17%) | 3.2 (16%) | 3.6 (16%) | 3.6 (16%) |
| <i>Acer campestre</i>             | 2.6 (19%) | 2.7 (20%) | 2.8 (22%) | 2.9 (23%) | 2.9 (23%) | 2.7 (21%) | 2.8 (21%) | 2.8 (21%) | 2.7 (21%) | 2.9 (22%) | 3.1 (22%) |
| <i>Acer monspessulanum</i>        | 1.4 (19%) | 1.9 (22%) | 2.2 (26%) | 1.9 (24%) | 1.6 (19%) | 2.0 (22%) | 2.1 (24%) | 1.8 (22%) | 1.8 (22%) | 1.6 (21%) | 1.8 (21%) |
| <i>Acer opalus</i>                | 2.1 (20%) | 2.5 (20%) | 2.7 (26%) | 2.2 (21%) | 2.1 (19%) | 2.4 (21%) | 2.2 (21%) | 2.2 (21%) | 2.2 (19%) | 2.8 (22%) | 2.6 (22%) |
| <i>Acer pseudoplatanus</i>        | 3.0 (18%) | 3.3 (20%) | 3.2 (19%) | 3.5 (21%) | 3.3 (20%) | 2.8 (16%) | 3.5 (21%) | 2.9 (18%) | 3.1 (19%) | 3.2 (18%) | 3.7 (21%) |
| <i>Alnus glutinosa</i>            | 3.7 (22%) | 3.9 (23%) | 3.8 (22%) | 3.7 (22%) | 3.7 (21%) | 3.8 (21%) | 3.7 (22%) | 3.6 (20%) | 3.7 (23%) | 4.0 (22%) | 4.4 (25%) |
| <i>Arbutus unedo</i>              | 1.7 (28%) | 1.2 (20%) | 1.2 (20%) | 1.2 (20%) | 1.4 (23%) | 1.5 (24%) | 1.3 (21%) | 1.2 (19%) | 1.4 (23%) | 1.2 (22%) | 1.2 (21%) |
| <i>Betula pendula</i>             | 2.7 (18%) | 2.7 (17%) | 2.8 (18%) | 2.9 (19%) | 2.8 (18%) | 2.9 (19%) | 2.9 (19%) | 2.9 (18%) | 2.8 (18%) | 3.1 (18%) | 3.1 (19%) |
| <i>Carpinus betulus</i>           | 2.9 (19%) | 2.8 (19%) | 3.0 (21%) | 3.0 (21%) | 3.0 (20%) | 3.2 (21%) | 3.1 (20%) | 3.0 (19%) | 3.2 (20%) | 3.3 (21%) | 3.2 (20%) |
| <i>Castanea sativa</i>            | 3.5 (23%) | 3.4 (24%) | 3.5 (24%) | 3.7 (25%) | 3.7 (24%) | 3.6 (23%) | 3.6 (23%) | 3.7 (24%) | 3.8 (24%) | 3.7 (23%) | 3.9 (24%) |
| <i>Corylus avellana</i>           | 1.8 (19%) | 1.9 (21%) | 1.7 (19%) | 1.9 (22%) | 1.8 (21%) | 1.8 (20%) | 1.7 (19%) | 1.8 (21%) | 1.8 (20%) | 1.9 (21%) | 2.0 (22%) |
| <i>Crataegus monogyna</i>         |           |           | 1.9 (24%) | 1.6 (22%) | 1.6 (23%) | 1.6 (22%) | 1.8 (24%) | 1.7 (23%) | 1.7 (24%) | 1.7 (23%) | 1.8 (24%) |
| <i>Fagus sylvatica</i>            | 3.7 (19%) | 3.7 (20%) | 3.8 (20%) | 3.7 (20%) | 3.7 (20%) | 3.7 (19%) | 3.8 (20%) | 4.0 (20%) | 3.8 (20%) | 4.0 (19%) | 4.1 (20%) |
| <i>Fraxinus excelsior</i>         | 3.7 (19%) | 3.7 (20%) | 3.7 (20%) | 3.8 (21%) | 3.9 (21%) | 3.7 (20%) | 3.6 (19%) | 3.8 (21%) | 3.9 (21%) | 3.9 (20%) | 4.0 (20%) |
| <i>Ilex aquifolium</i>            |           |           | 1.9 (23%) | 1.7 (24%) | 1.6 (22%) | 1.6 (22%) | 1.7 (21%) | 1.7 (23%) | 1.5 (19%) | 1.5 (21%) | 1.5 (21%) |
| <i>Larix decidua</i>              | 3.3 (17%) | 3.5 (18%) | 3.8 (21%) | 3.2 (18%) | 3.7 (19%) | 3.9 (22%) | 4.1 (23%) | 3.8 (21%) | 3.7 (19%) | 4.4 (24%) | 4.6 (23%) |
| <i>Picea abies</i>                | 3.3 (17%) | 3.3 (16%) | 3.4 (17%) | 3.4 (17%) | 3.6 (17%) | 3.5 (17%) | 3.6 (17%) | 3.6 (17%) | 3.5 (16%) | 3.8 (17%) | 3.7 (16%) |
| <i>Picea sitchensis</i>           | 3.5 (18%) | 3.1 (17%) | 3.4 (17%) | 3.3 (16%) | 3.6 (18%) | 3.1 (15%) | 3.6 (19%) | 4.2 (19%) | 4.0 (20%) | 3.1 (14%) | 3.5 (15%) |
| <i>Pinus halepensis</i>           | 2.1 (18%) | 2.5 (20%) | 2.8 (21%) | 2.2 (18%) | 2.6 (21%) | 2.4 (19%) | 2.5 (20%) | 2.3 (19%) | 2.7 (22%) | 2.7 (22%) | 2.3 (18%) |
| <i>Pinus nigra</i>                | 3.0 (21%) | 2.6 (19%) | 2.8 (20%) | 2.7 (20%) | 2.7 (20%) | 2.7 (18%) | 2.7 (18%) | 3.1 (21%) | 3.0 (21%) | 2.9 (19%) | 2.9 (19%) |
| <i>Pinus nigra var. corsicana</i> | 3.2 (22%) | 3.5 (23%) | 3.7 (23%) | 3.4 (22%) | 3.8 (22%) | 3.4 (21%) | 2.9 (19%) | 3.5 (21%) | 3.5 (22%) | 5.0 (27%) | 3.5 (19%) |
| <i>Pinus pinaster</i>             | 2.9 (16%) | 2.5 (15%) | 2.8 (16%) | 2.7 (16%) | 2.9 (17%) | 2.8 (16%) | 2.7 (16%) | 2.7 (16%) | 2.7 (16%) | 2.9 (16%) | 3.1 (16%) |
| <i>Pinus sylvestris</i>           | 3.6 (25%) | 3.6 (25%) | 3.5 (25%) | 3.5 (25%) | 3.7 (25%) | 3.4 (22%) | 3.7 (24%) | 3.5 (23%) | 3.6 (24%) | 3.8 (24%) | 4.1 (25%) |
| <i>Pinus uncinata</i>             | 2.9 (25%) | 2.7 (26%) | 2.6 (26%) | 2.3 (21%) | 2.8 (26%) | 2.8 (26%) | 2.3 (23%) | 2.5 (25%) | 2.5 (25%) | 2.5 (21%) | 2.7 (24%) |
| <i>Populus spp.</i>               | 4.9 (19%) | 4.2 (16%) | 4.6 (18%) | 3.7 (15%) | 3.9 (17%) | 5.4 (22%) | 4.5 (19%) | 3.9 (16%) | 4.5 (18%) | 4.9 (18%) | 4.3 (17%) |
| <i>Populus tremula</i>            | 2.9 (17%) | 3.2 (18%) | 3.2 (18%) | 2.9 (16%) | 3.2 (18%) | 3.0 (17%) | 3.0 (17%) | 3.2 (17%) | 2.9 (16%) | 3.2 (16%) | 4.0 (21%) |
| <i>Prunus avium</i>               | 3.2 (21%) | 3.2 (22%) | 3.3 (22%) | 3.3 (23%) | 3.6 (25%) | 3.4 (24%) | 3.3 (22%) | 3.2 (22%) | 3.2 (21%) | 3.4 (21%) | 3.4 (22%) |
| <i>Pseudotsuga menziesii</i>      | 3.0 (15%) | 3.1 (15%) | 3.5 (17%) | 3.3 (16%) | 3.5 (16%) | 3.4 (15%) | 3.2 (14%) | 3.4 (15%) | 3.2 (13%) | 3.5 (14%) | 3.4 (13%) |
| <i>Quercus ilex</i>               | 2.3 (27%) | 2.2 (26%) | 2.0 (26%) | 2.1 (28%) | 2.0 (28%) | 2.0 (26%) | 1.9 (26%) | 1.8 (26%) | 2.4 (33%) | 2.1 (27%) | 1.9 (26%) |
| <i>Quercus patraea</i>            | 3.3 (17%) | 3.3 (17%) | 3.5 (18%) | 3.4 (17%) | 3.6 (18%) | 3.3 (16%) | 3.5 (18%) | 3.4 (17%) | 3.3 (16%) | 3.6 (16%) | 3.6 (17%) |
| <i>Quercus pubescens</i>          | 2.8 (26%) | 2.7 (25%) | 2.9 (27%) | 3.1 (27%) | 3.0 (26%) | 3.1 (26%) | 3.1 (25%) | 3.1 (26%) | 3.0 (25%) | 3.0 (25%) | 3.4 (28%) |
| <i>Quercus pyrenaica</i>          | 2.8 (20%) | 2.4 (18%) | 3.1 (23%) | 2.9 (21%) | 3.4 (24%) | 2.9 (21%) | 2.7 (20%) | 3.0 (20%) | 2.5 (20%) | 3.1 (21%) | 2.9 (18%) |
| <i>Quercus robur</i>              | 3.4 (18%) | 3.6 (19%) | 3.7 (20%) | 3.6 (20%) | 3.6 (20%) | 3.6 (19%) | 3.7 (20%) | 3.8 (20%) | 3.7 (20%) | 3.8 (19%) | 4.0 (19%) |
| <i>Quercus rubra</i>              | 2.4 (13%) | 2.5 (15%) | 2.7 (15%) | 3.1 (17%) | 3.3 (19%) | 2.3 (13%) | 3.4 (19%) | 3.1 (21%) | 3.5 (19%) | 3.3 (18%) | 3.8 (18%) |
| <i>Quercus suber</i>              | 2.0 (23%) | 1.6 (21%) | 1.9 (23%) | 1.7 (21%) | 1.9 (23%) | 2.1 (25%) | 2.0 (24%) | 1.6 (22%) | 1.9 (24%) | 2.0 (27%) | 2.2 (24%) |
| <i>Robinia pseudoacacia</i>       | 3.3 (20%) | 3.4 (21%) | 3.3 (21%) | 3.5 (21%) | 3.7 (23%) | 3.5 (22%) | 3.7 (22%) | 3.4 (22%) | 3.3 (21%) | 3.7 (22%) | 3.7 (22%) |
| <i>Salix caprea</i>               | 2.6 (22%) | 3.0 (26%) | 2.8 (26%) | 2.8 (26%) | 2.9 (27%) | 2.9 (26%) | 3.0 (29%) | 2.9 (26%) | 2.9 (27%) | 3.4 (30%) | 3.1 (28%) |
| <i>Salix cinerea</i>              | 2.7 (24%) | 2.2 (20%) | 2.1 (23%) | 3.9 (35%) | 2.6 (29%) | 2.7 (29%) | 2.2 (24%) | 1.9 (20%) | 2.0 (23%) | 2.9 (27%) | 2.9 (30%) |
| <i>Sorbus aria</i>                | 2.2 (22%) | 2.3 (24%) | 2.3 (24%) | 2.3 (24%) | 2.4 (23%) | 2.3 (23%) | 2.3 (23%) | 2.4 (24%) | 2.5 (25%) | 2.3 (23%) | 2.5 (24%) |
| <i>Sorbus aucuparia</i>           | 2.5 (23%) | 2.5 (23%) | 2.7 (27%) | 2.5 (25%) | 2.6 (27%) | 2.0 (20%) | 2.2 (22%) | 2.6 (26%) | 2.1 (24%) | 2.1 (20%) | 2.2 (22%) |
| <i>Sorbus torminalis</i>          | 2.3 (20%) | 2.4 (21%) | 2.3 (22%) | 2.2 (19%) | 2.3 (21%) | 2.2 (20%) | 2.4 (21%) | 2.4 (21%) | 2.3 (22%) | 2.2 (19%) | 1.9 (17%) |
| <i>Tilia cordata</i>              | 3.4 (21%) | 3.0 (19%) | 2.9 (18%) | 3.1 (20%) | 2.9 (18%) | 3.3 (21%) | 3.1 (21%) | 3.6 (22%) | 3.3 (20%) | 2.9 (17%) | 4.1 (23%) |
| <i>Tilia platyphyllos</i>         | 3.6 (22%) | 2.9 (18%) | 2.9 (18%) | 3.2 (21%) | 3.3 (21%) | 3.0 (19%) | 3.1 (20%) | 2.8 (19%) | 3.6 (23%) | 3.4 (19%) | 4.3 (25%) |
| <i>Ulmus minor</i>                | 2.4 (21%) | 2.7 (23%) | 2.6 (23%) | 2.6 (24%) | 2.5 (23%) | 2.9 (25%) | 2.7 (23%) | 2.8 (24%) | 2.7 (25%) | 3.1 (27%) | 2.8 (25%) |

Table SM5: Covariance parameter estimates and estimated DBH for variance parity between the plot and the residual levels.

| Species                                  | $\widehat{\sigma}_{\text{plot}}^2$ | $\widehat{\sigma}_{\text{res}}^2$ | DBH for variance parity (cm) |
|------------------------------------------|------------------------------------|-----------------------------------|------------------------------|
| <i>Abies alba</i>                        | 0.4562                             | 5.0238                            | 26.6                         |
| <i>Acer campestre</i>                    | 0.5561                             | 3.3081                            | 10.5                         |
| <i>Acer monspessulanum</i>               | 0.3321                             | 1.2767                            | 6.1                          |
| <i>Acer opalus</i>                       | 0.4650                             | 1.5542                            | 5.2                          |
| <i>Acer pseudoplatanus</i>               | 0.6050                             | 4.5825                            | 14.7                         |
| <i>Alnus glutinosa</i>                   | 0.8245                             | 5.7389                            | 13.0                         |
| <i>Arbutus unedo</i>                     | 0.1946                             | 0.6603                            | 5.3                          |
| <i>Betula pendula</i>                    | 0.6336                             | 3.0446                            | 8.0                          |
| <i>Carpinus betulus</i>                  | 0.5534                             | 4.7359                            | 17.6                         |
| <i>Castanea sativa</i>                   | 0.7771                             | 4.5852                            | 10.3                         |
| <i>Corylus avellana</i>                  | 0.3168                             | 1.6115                            | 8.5                          |
| <i>Crataegus monogyna</i>                | 0.2829                             | 1.3563                            | 7.9                          |
| <i>Fagus sylvatica</i>                   | 0.6868                             | 6.1405                            | 18.9                         |
| <i>Fraxinus excelsior</i>                | 0.8046                             | 5.7101                            | 13.4                         |
| <i>Ilex aquifolium</i>                   | 0.2061                             | 1.3692                            | 12.2                         |
| <i>Larix decidua</i>                     | 0.6526                             | 6.1333                            | 20.4                         |
| <i>Picea abies</i>                       | 0.5832                             | 5.5799                            | 21.0                         |
| <i>Picea sitchensis</i>                  | 0.7502                             | 3.6508                            | 8.1                          |
| <i>Pinus halepensis</i>                  | 0.3176                             | 2.0956                            | 12.0                         |
| <i>Pinus nigra</i>                       | 0.4935                             | 2.4609                            | 8.3                          |
| <i>Pinus nigra</i> var. <i>corsicana</i> | 0.7751                             | 3.0988                            | 6.4                          |
| <i>Pinus pinaster</i>                    | 0.4494                             | 2.3341                            | 8.8                          |
| <i>Pinus sylvestris</i>                  | 0.8558                             | 3.6469                            | 6.9                          |
| <i>Pinus uncinata</i>                    | 0.3665                             | 2.9550                            | 16.1                         |
| <i>Populus</i> spp.                      | 1.0404                             | 5.9732                            | 10.0                         |
| <i>Populus tremula</i>                   | 0.6955                             | 3.2950                            | 7.8                          |
| <i>Prunus avium</i>                      | 0.7998                             | 3.7102                            | 7.6                          |
| <i>Pseudotsuga menziesii</i>             | 0.6052                             | 3.8075                            | 11.3                         |
| <i>Quercus ilex</i>                      | 0.2469                             | 1.4855                            | 10.6                         |
| <i>Quercus patraea</i>                   | 0.6605                             | 4.0276                            | 10.8                         |
| <i>Quercus pubescens</i>                 | 0.6680                             | 2.6939                            | 6.4                          |
| <i>Quercus pyrenaica</i>                 | 0.5906                             | 2.6920                            | 7.5                          |
| <i>Quercus robur</i>                     | 0.7357                             | 4.8451                            | 12.0                         |
| <i>Quercus rubra</i>                     | 0.5496                             | 4.1804                            | 14.8                         |
| <i>Quercus suber</i>                     | 0.1851                             | 1.2886                            | 13.0                         |
| <i>Robinia pseudoacacia</i>              | 0.7590                             | 5.1085                            | 12.4                         |
| <i>Salix caprea</i>                      | 0.7823                             | 2.6706                            | 5.3                          |
| <i>Salix cinerea</i>                     | 0.4066                             | 3.0518                            | 14.5                         |
| <i>Sorbus aria</i>                       | 0.6109                             | 1.5782                            | 4.0                          |
| <i>Sorbus aucuparia</i>                  | 0.5581                             | 2.1675                            | 6.2                          |
| <i>Sorbus torminalis</i>                 | 0.5088                             | 1.8428                            | 5.7                          |
| <i>Tilia cordata</i>                     | 0.6024                             | 5.0726                            | 17.2                         |
| <i>Tilia platyphyllos</i>                | 0.6072                             | 4.8219                            | 15.7                         |
| <i>Ulmus minor</i>                       | 0.5682                             | 3.1927                            | 9.7                          |
